# Supplementary material for: Genome-wide analysis of tomato NF-Y factors and their role in fruit ripening
Source: PubMed Central journal article supplement (PMC4705811; doi:10.1186/s12864-015-2334-2), 2016-01-07
Supplement: 12864_2015_2334_MOESM6_ESM.pdf [file 12864_2015_2334_MOESM6_ESM.pdf]

## Primers for real time PCR analysis in ripening process of tomato fruit

|    | primers                                | sequences (5'to3')                                      | bases    | length |
|----|----------------------------------------|---------------------------------------------------------|----------|--------|
| 1  | Solyc01g006930-FS<br>Solyc01g006930-RA | TTTCGTGTCTGGTAAGTGGGTTTGC<br>GGTTGTAGCACGGATGAGGTGAGGC  | 25<br>25 | 123    |
| 2  | Solyc01g079870-FS<br>Solyc01g079870-RA | AAAGCGGATGAAGATGTTAGGATGA<br>TCTCACAGGCACGAGCAAATACGAC  | 25<br>25 | 69     |
| 3  | Solyc01g087240-FS<br>Solyc01g087240-RA | GGTCAGCCCAGCATGGTTCCGTCTC<br>AAGAATGAATTGCCTGAGCATAGCC  | 25<br>25 | 99     |
| 4  | Solyc01g096710-FS<br>Solyc01g096710-RA | GGCAGATGAAATAACAAACAAATGG<br>GACAATAAGAAATAGACGGACACT   | 25<br>25 | 131    |
| 5  | Solyc03g110860-FS<br>Solyc03g110860-RA | TACCAACGCAAGGAAATCGAACAGG<br>GCTTCAGCGGAGATCATAACGGACAT | 25<br>25 | 116    |
| 6  | Solyc06g016750-FS<br>Solyc06g016750-RA | GATTCGTCATACCATCTTCCAGTG<br>CTCCTCCTCTTCTTCGTCTTCTTTG   | 25<br>25 | 132    |
| 7  | Solyc06g069310-FS<br>Solyc06g069310-RA | AAGTGCAGTAATGGAGCTGAAATG<br>TCTGCTTCTGAATCTTGCTGCTTGG   | 24<br>25 | 131    |
| 8  | Solyc06g072040-FS<br>Solyc06g072040-RA | CAGACTCCATAACCACCATCTCCTTC<br>CATTGACTTGCTCGATTTCTTGACG | 25<br>25 | 91     |
| 9  | Solyc07g065500-FS<br>Solyc07g065500-RA | GGGAAGCATCAGATAAGTGTCAAAG<br>ATTGCCACAACAGATCATCACCAT   | 25<br>25 | 70     |
| 10 | Solyc08g062210-FS<br>Solyc08g062210-RA | CAAGCCTTCATCTCCAATGCACGAC<br>TAGATAAGTTGCCACCTGCCTGTCTG | 25<br>25 | 65     |
| 11 | Solyc09g007290-FS<br>Solyc09g007290-RA | TTGCGAAGGATGCTAAGGAGACTGT<br>TTGCCTCGCTAGTAATGAAGCTGAT  | 25<br>25 | 72     |
| 12 | Solyc11g065700-FS<br>Solyc11g065700-RA | CTGGTTCTGTGAGTTCATCGGGTTC<br>GATTGCCATAACTGCTACCATTG    | 25<br>24 | 129    |
| 13 | Solyc11g068480-FS<br>Solyc11g068480-RA | ACTTCTTCGTGACTCGCTTCTTGCT<br>TTATCGTTTGCCCTCTTAGACTCCT  | 25<br>25 | 111    |
| 14 | actin-FS<br>actin-RA                   | CAGCAGATGTGGATCTCAAA<br>CTGTGGACAATGGAAGGAC             | 20<br>19 | 59     |
