# Supplementary material for: Genome-wide analysis of tomato NF-Y factors and their role in fruit ripening
Source: PubMed Central journal article supplement (PMC4705811; doi:10.1186/s12864-015-2334-2), 2016-01-07
Supplement: 12864_2015_2334_MOESM7_ESM.pdf [file 12864_2015_2334_MOESM7_ESM.pdf]

### Primers of plasmid construction for VIGS

| vector                       | primers  | sequences (5'to3')                      | bases | location  | length |
|------------------------------|----------|-----------------------------------------|-------|-----------|--------|
| 1 <i>pTRV2</i> -tPDS         | Forward  | GCTCTAGA GACAGGGTGACAGATGAGGT           | 28    | 1084–1559 | 476    |
|                              | Backward | CGAGCTCTCTTTCCAGTCTTCAGGCA              | 26    |           |        |
| 2 <i>pTRV2</i> -t6930        | Forward  | GCCTCCATGGGGATCC GAAGGCTATATTTTCATTGGTC | 37    | 1–500     | 500    |
|                              | Backward | GCTCGGTACCGGATCC GGAAGTTTTTGCCCATTTGC   | 36    |           |        |
| 3 <i>pTRV2</i> -t9870        | Forward  | GCCTCCATGGGGATCC GGGCTTCCCTCGATGTGA     | 34    | 33–490    | 458    |
|                              | Backward | GCTCGGTACCGGATCC ATTCTTGAAATCAGTAACATGC | 38    |           |        |
| 4 <i>pTRV2</i> -t7240        | Forward  | GCCTCCATGGGGATCC CATATGTATGTAATAGACACA  | 38    | 24–500    | 477    |
|                              | Backward | GCTCGGTACCGGATCC AGTCATCATTCCCCCATAAC   | 35    |           |        |
|                              |          |                                         |       | 2–500     | 499    |
| 5 <i>pTRV2</i> -t6710        | Forward  | GCCTCCATGGGGATCC AATACCTTCGTTTTGCACTTT  | 37    |           |        |
|                              | Backward | GCTCGGTACCGGATCC TAGCAACTTTCCTTCTTTTTG  | 37    |           |        |
| 6 <i>pTRV2</i> -t0860/t2040  | Forward  | GCCTCCATGGGGATCC CATTACGCGGACTGATATTT   | 36    | 444–903   | 460    |
|                              | Backward | GCTCGGTACCGGATCC ATTCAAGTCATTACAGTTAAGC | 38    |           |        |
| 7 <i>pTRV2</i> -t6750        | Forward  | GCCTCCATGGGGATCC GAAGGAAGGAGATGAAGAG    | 35    | 952–1411  | 460    |
|                              | Backward | GCTCGGTACCGGATCC TCTGGGTCGTTTGAAACA     | 35    |           |        |
| 8 <i>pTRV2</i> -t9310        | Forward  | GCCTCCATGGGGATCC GAAACGAACAATCGCACCC    | 35    | 284–687   | 404    |
|                              | Backward | GCTCGGTACCGGATCC GAACTAGAGCCCTCACAAG    | 35    |           |        |
| 9 <i>pTRV2</i> -t5500        | Forward  | GCCTCCATGGGGATCC GATAATGAATCAGGAGGACA   | 36    | 13–495    | 483    |
|                              | Backward | GCTCGGTACCGGATCC AGCATTCTCCCCCGTATG     | 34    |           |        |
| 10 <i>pTRV2</i> -t2210/t5700 | Forward  | GCCTCCATGGGGATCC GTGTAAAGCTTCTAGAGCAC   | 36    | 4–492     | 489    |
|                              | Backward | GCTCGGTACCGGATCC ACGAGCCTTCCAAAGTAAG    | 35    |           |        |
| 11 <i>pTRV2</i> -t7290       | Forward  | GCCTCCATGGGGATCC CAAGTGCCAGAGAGAGAAA    | 35    | 237–649   | 413    |
|                              | Backward | GCTCGGTACCGGATCC GACATGGCACTCACTAGAG    | 35    |           |        |
| 12 <i>pTRV2</i> -t8480       | Forward  | GCCTCCATGGGGATCC ATGGCGGAGATAGAGAAGC    | 35    | 1–475     | 475    |
|                              | Backward | GCTCGGTACCGGATCC CTTCATTTTCGTTATCCGAG   | 36    |           |        |
