# Supplementary material for: Genome-wide analysis of tomato NF-Y factors and their role in fruit ripening
Source: PubMed Central journal article supplement (PMC4705811; doi:10.1186/s12864-015-2334-2), 2016-01-07
Supplement: 12864_2015_2334_MOESM8_ESM.pdf [file 12864_2015_2334_MOESM8_ESM.pdf]

### Primers for real time PCR analysis in VIGS assay

|   | primers           | sequences (5'to3')         | bases | length |
|---|-------------------|----------------------------|-------|--------|
| 1 | Solyc08g062210-FS | CAAGCCTTCATCTCCAATGCACGAC  | 25    | 65     |
|   | Solyc08g062210-RA | TAGATAAGTTGCCACCTGCCTGTCTG | 25    |        |
| 2 | Solyc07g065500-FS | TCAACATCATCAAGGACACGGGTAT  | 25    | 112    |
|   | Solyc07g065500-RA | TTGCCTCCCAACGTCAGGAAACCGC  | 25    |        |
| 3 | Solyc11g065700-FS | CTGGTTCTGTGAGTTCATCGGGTTC  | 25    | 129    |
|   | Solyc11g065700-RA | GATTGCCATAACTGCTACCATTG    | 24    |        |
| 4 | Solyc01g087240-FS | GGTCAGCCCAGCATGGTTCCTCTC   | 25    | 99     |
|   | Solyc01g087240-RA | AAGAATGAATTGCCTGAGCATAGCC  | 25    |        |
| 5 | Solyc06g069310-FS | TTGTCCCCTAAAGTTTCTTGTCAGT  | 25    | 74     |
|   | Solyc06g069310-RA | GTGAGCTAATGGCCAATTCAGTGAC  | 25    |        |
| 6 | PDS-FS            | AGTTAGTCGGAGTACCTGTG       | 20    | 94     |
|   | PDS-RA            | AGTGAGCTTCTGCTGAAGAG       | 20    |        |
| 7 | actin-FS          | CAGCAGATGTGGATCTCAA        | 20    | 59     |
|   | actin-RA          | CTGTGGACAATGGAAGGAC        | 19    |        |
