# Supplementary material for: Genome-wide analysis of tomato NF-Y factors and their role in fruit ripening
Source: PubMed Central journal article supplement (PMC4705811; doi:10.1186/s12864-015-2334-2), 2016-01-07
Supplement: 12864_2015_2334_MOESM9_ESM.pdf [file 12864_2015_2334_MOESM9_ESM.pdf]

### Primers of plasmid construction for subcellular localization

|   | primers                                | sequences (5'to3')                                                          | bases    | length |
|---|----------------------------------------|-----------------------------------------------------------------------------|----------|--------|
| 1 | Solyc08g062210-FS<br>Solyc08g062210-RA | CGGGATCC ATGCTAAGTTTCTCAAAGAAAGGTG<br>ACGCGTCGAC GGTCCAACATGCAGGAAGTCTTCA   | 33<br>35 | 975    |
| 2 | Solyc07g065500-FS<br>Solyc07g065500-RA | CGGGATCC ATGGCGGATTCGGATAATGAATCAG<br>ACGCGTCGAC CCTTTGCCTCCCAACGTCAGGAAAC  | 33<br>35 | 546    |
| 3 | Solyc11g065700-FS<br>Solyc11g065700-RA | CGGGATCC ATGCCATCAAATTCCAAAAGCACAA<br>ACGCGTCGAC CTTGACAGAAAAACCTCCTCCCTG   | 33<br>35 | 900    |
| 4 | Solyc01g087240-FS<br>Solyc01g087240-RA | ACGCGTCGAC ATGCCTACTATTGCTAAACATGATG<br>CCCAAGCTT ATTGCTGGAAGCTGCCCCCTGAGAA | 35<br>34 | 909    |
| 5 | Solyc06g069310-FS<br>Solyc06g069310-RA | CGGGATCC ATGTTGCCCCAGATGTTTCGTGTTG<br>ACGCGTCGAC GCTATTCAAGTTTGCTCTGCTTCT   | 33<br>35 | 393    |
