# Supplementary material for: Genome-wide analysis of tomato NF-Y factors and their role in fruit ripening
Source: PubMed Central journal article supplement (PMC4705811; doi:10.1186/s12864-015-2334-2), 2016-01-07
Supplement: 12864_2015_2334_MOESM10_ESM.pdf [file 12864_2015_2334_MOESM10_ESM.pdf]

## CDS of *NF-Y* genes in subcellular localization

| Gene ID          | Length(bp) | CDS                                                                                                                                                                                                                                                                                                                                                                                                                                                                                                                                                                                                                                                                                                                                                                                                                                                                                                                                                                                                                                                                             |
|------------------|------------|---------------------------------------------------------------------------------------------------------------------------------------------------------------------------------------------------------------------------------------------------------------------------------------------------------------------------------------------------------------------------------------------------------------------------------------------------------------------------------------------------------------------------------------------------------------------------------------------------------------------------------------------------------------------------------------------------------------------------------------------------------------------------------------------------------------------------------------------------------------------------------------------------------------------------------------------------------------------------------------------------------------------------------------------------------------------------------|
| 1 Solyc08g062210 | 975        | <p>ATGCTAAGTTTCTCAAAGAAAGGTGGCCCTGGAAAAGAAGGTCAATCTTTTGCTCCTTTGTTTGTGAGTTGCTCATCTATG<br/> TGGAAATCCAGCGACAAAAGCAGAATATGCTCCCTCTAAGAAGGTGCTGACCGGAGTGAATCTGCAATTGGAACATCACTCC<br/> GACATCAAGAAATCAGAATGCCAGTTCGAAGATCAGGATTAACCGTCTACTCTGTCAACTGGTCAATCTAATCATGTGGAG<br/> GCCGCAATGGGAAAAAGCAATACTGTTCTTCAAAATGTTGCAGTTCATCCAGGTTGGGGTGGAACTTATGAGGTGCAAGCA<br/> GAGAGTGGAAACAAACGCATCCCGATCAGGCGAAAAGTGACACCAACTCTCCCCAGCCACAAGTGAATCATAATCATCCA<br/> ATGGCTTGGTATCTACCCCTTCGCTGACACTTACTTTGGAAGGCTCGTGACTGCTTATGGATCAAATGCCATCATTAT<br/> CCTCAAATGGTTGGTGTACCTCTACTAGAGTTGCACTTCTCTGAATGCACCGAGAGCTTGCCCATTTATGTGAATGCG<br/> AAACAATACAGTGCTATTCTCAAAGGCGACAGGTCCTGGCCAAGCTAGAGGCTCAAAAAGCTGTCAAAGACAGAAAAG<br/> CCATATCTTACGAGTCTCGACATCGTATGCAATGAAGAGAGCTAGGGGTTCTGGAGGACGCTTTTGAACAAAAGAAAT<br/> ATGCAGGAATCCAAGCCTTCATCTCCAATGCACGACAGAAAATATCTTAAAGCGACAGGAGGTGGCAACTTATCTAGTTCC<br/> ATGGTTGAGCACTCAGAGAGTGGTAGTTGGGGACTTCCACCCAATCTGGTTCTGATGTGACAAGTATCTTCAAGTGGTAC<br/> AACATGTTCCAGCAACCAGAGTTCAGAGTCTCTGGCTTCCCTTTTACATTCAGGAAGCTGAAGACTTCTGCATGTTGGA<br/> ACC</p> |
| 2 Solyc07g065500 | 546        | <p>ATGGCGGATTCGGATAATGAATCAGGAGGACATAGAGATAACAGTAACATTGAGAGTTCCTTAAGAGAACAAGACAGGTTCC<br/> CTTCCCATAGCAAATGTAAGCAGAATCATGAAGAAAGCTTTACCAGCTAACGCGAAAATCTCAAAAGATGCTAAGGAGGTA<br/> GTTCAAGAATGTGTTTCTGAATTCATAAGTTTCATCACAGGGGAAGCATCAGATAAGTGTCAAAGAGAAAAGAGAAAAGACA<br/> ATCAATGGTGATGATCTGTTGTGGCAATGACAACTCTGGTTTGAAGAATACATTGAGCCACTCAAGATTTATTTGCAG<br/> AGGTTTAGGGATTTGGAAGGGCAAAAAGTGGTGTCTCTGGAGAGAAGGATCATAGTGGATCAGTGGTTATGTTGAGGAC<br/> TACCATGGCATGATGATGATGGGAGTCAACATCATCAAGGACACGGGTATGGCACCGGTGATACAATCATCATACGGGG<br/> GAGAATGCTGCAGGGTTGGTACAGGAGGTCGCGGTTCTGACGTTGGGAGGCAAAAG</p>                                                                                                                                                                                                                                                                                                                                                                                                                                                                            |
| 3 Solyc11g065700 | 900        | <p>ATGCCATCAAATCCAAAAGCACAATCGGGAGGAAAACCAATGCATATAATGTTCCAGTTCCTACTGTATATCCTGAACCT<br/> TGGTGAATGGTGTGTTTATACTCTGTTTCCCTGGGTTGATGCGGGAAAATGCATCAGATTCATCATATTGGAACAA<br/> TCCGTGGATGGCAAATCTCAGTCTGATGGTGGAAATCAATGAGGAAGATGATGATGCTCCGAAAATCACAAGTGTGTA<br/> CCTTTGCATGCAGATGGGAGTTATGGGAAGCGGATCAGAAATTTACAGCCAGCTGCCAGCCATACCTCAAAGACTTGAT<br/> GGAAGCCTAGCACAGCCCAGCAGCTTGAACCTGTTGGACACTCTATTGCGTGTGCTCCAAACCCATATGTTGATCCATA<br/> TATGGCGGGATGATGACAGCTTTTGGCCAGCCTTTGGTTCCCTCATGTAATGATATGCATATGCAAGGATGCCCTTG<br/> CCACAAGAAATGGCTCAAGAACCAGTTTATGTTAATGCTAAGCAGTATCGAAGGATCCTGCAGCGAAGACAGTCAAGTGT<br/> AAAGCAGAACTGAAAAGAAGCAAATAAAGGTTAGAAAGCCATATCTTACGAGTCTCGACATCAGATGCACTGAGGAGG<br/> GTAAGGGCCTCGGTTGGACGTTTGGCCAAAAGACAGATGCTTCAAGGTTACTGGTTCTGTGAGTTCATCGGTTCTGAA<br/> CCTTTGCAGTTCAATGCTGCTGATATTCAAAGAGGAATGAAAATGGAAGGTTGGCCGAGCTTCAGCAGTCTTATTCAAAT<br/> GGTAGCAGTTATGGCAATCAAAGTAGCTTTCAAAGAATCAAAGGATGAGTACCAGTCTGTGAAAAGCAGGGAAGGAGTTTT<br/> TCTGTCAAG</p>                                                                                            |
| 4 Solyc01g087240 | 909        | <p>ATGCCTACTATTGCTAAACATGATGGTCGGCAGCTGGAGACTGGGCTGCGAATTACCTCACTATCAACTACCCAAATGCCAA<br/> CCATGGTGGCACGGTTATGGTGATAATACTATGCCTTTGGCTAGTGAGAATGCCGTTGCCAGGAGAAAATCTGAAGGTGGC<br/> AACCAGGATAAAGAAAACAAGGCTTAGCCATGGAATCTGGATCAGATGGAAATAACGAGCAATACAAGCAGCACCTCAAG<br/> CATTTTGCACCCACAACCTGCTGCCATCATGGCTGAGCAGCAGAAGAACTCACAGGTCATTCAGCTATGTTGGCGTCATAT<br/> CCATATCCAGATATGCAGTATGGGGAAATGATGACTTATGGCGCACCTGTACATCCCCTTATTTGAAATTCATCATGCC<br/> CGAATGCCTTTGCCTCTCGACATGGAAGAGGAACCTGTCTACGTGAATGCAAAACAGTACCATGGAATATTAAGGCGAAGA<br/> CAGATAAGAGCTAAAGCAGAGCTTGAGAGGAAAGCTATTAAGCGAGAAAGCCATATCTGCATGAATCTCGGCATCAGCAT<br/> GCTATGAGAAGGCAAGGGAACTGGAGGCGCTTTCTGAATACTAAAAGCTCAATGACATGGACTGTACACCAACGGAG<br/> ACTCAAAAATATGGGGCAACCATTGCAACTCACTTGGCAACTCTTCTGGTTCCGGAGTCTGATCAAGGGGAAAAGGAA<br/> GGATCTACAGTTCAAGACATGCACAAAGGACACAGCCAGATTTCAACTGGCAATGGCCATGGTTTCTGTGTATTTT<br/> TCCGCGAGCAGTGAAGTGAGCAAGGGAATGGCCATTACGGTTCATGGAAGTTGGAGCTGCTGTTCAATCAGGCTTCTCAG<br/> GGGCAGCTTCCAGCAAT</p>                                                                           |
| 5 Solyc06g069310 | 393        | <p>ATGTTGCCCCAGATGTTGCTGTTGCCCGAGATACTCAAGATCTTTTATTGAAATGTTGTGTAGAGTTTCAATCTTATC<br/> TCATCAGAATCCAATGAAGTTTGTAAATAGAGAAGAAAACGAACAATCGCACCCGAACATGTAAGGCTTTACAGGTT<br/> CTTGGTTTTGGGGAATATATTGAAGAAGTCTATGCTGCATATGAACAACACAAGCTAGAGACCATGGACACTGTGAGAGCT<br/> GAAAAGTGCAGTAATGGAGCTGAAATGACTGAAGAAGAAGCATTAGCTGAGCAACAGAGGATGTTTGTGAGGCGCTGCA<br/> AGGATGAATGGTGGTTACAGGTCCTCCCAAGCAGCAAGATTGAGAAGCAGAGCAAACTTGAATAGC</p>                                                                                                                                                                                                                                                                                                                                                                                                                                                                                                                                                                                                                                                    |
